# Supplementary figures and images for: Morphology control of ordered mesoporous carbons by changing HCl concentration
Source: Royal Society of Chemistry journal article supplement (doi:10.1039/c0jm04586a), 2011-01-01

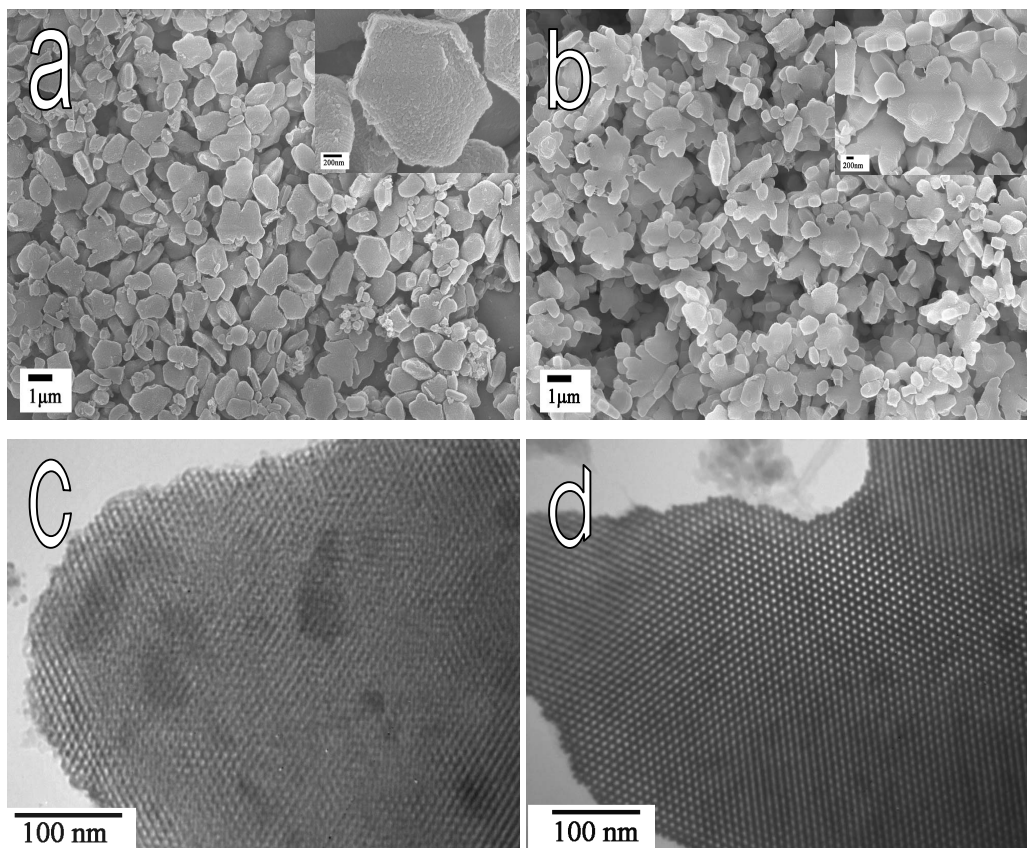

Fig. S1 (a) SEM image of S3; (b) SEM image of S4; (c) TEM image of S3; (d) TEM image of S4.

Supplement: c0jm04586a.pdf [file c0jm04586a.pdf]
